# Supplementary material for: Continuous-flow and safe synthesis of 3-amino-4-amidoximinofurazan
Source: Royal Society of Chemistry journal article supplement (doi:10.1039/d2re00127f), 2023-01-01
Supplement: d2re00127f1.pdf [file d2re00127f1.pdf]

## Supporting Information Profiles

### Continuous-flow and safe synthesis of 3-amino-4-amidoximinofurazan

Shichun Weng<sup>a</sup>, Wei Feng<sup>b</sup>, Wenqian Wu<sup>a</sup>, Zichao Guo<sup>a\*</sup>, Junjie Li<sup>a</sup>, Huanhuan Chen<sup>a</sup>, Liping Chen<sup>a</sup>, Wanghua Chen<sup>a</sup>,

<sup>a</sup> Department of Safety Engineering, School of Chemical Engineering, Nanjing University of Science and Technology, Nanjing, Jiangsu, 210094, China

<sup>b</sup> Xi'an Modern Chemistry Research Institute, Shanxi, 710065, China

\*Corresponding author: e-mail: gzc319@njust.edu.cn, Tel: +86 25 84315526, Fax: +86 25 84315526

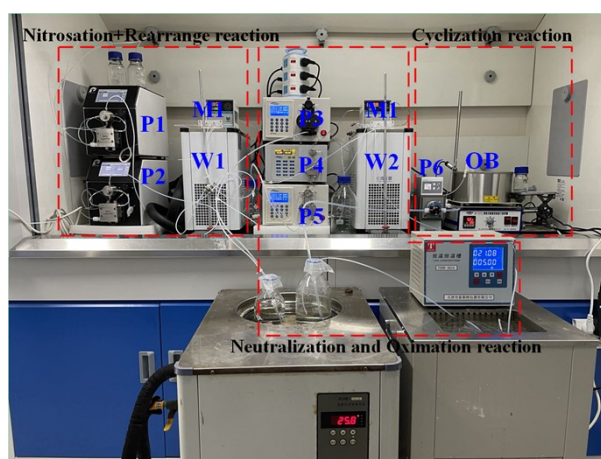

**Figure S1.** The actual picture of the whole flow setup for synthesise AAOF.

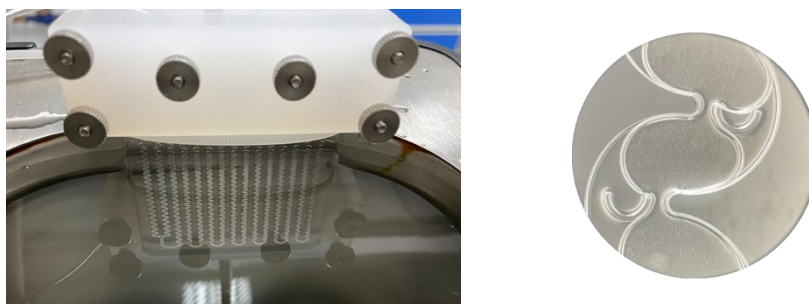

**Figure S2.** local enlarged image of microchannel reactor.

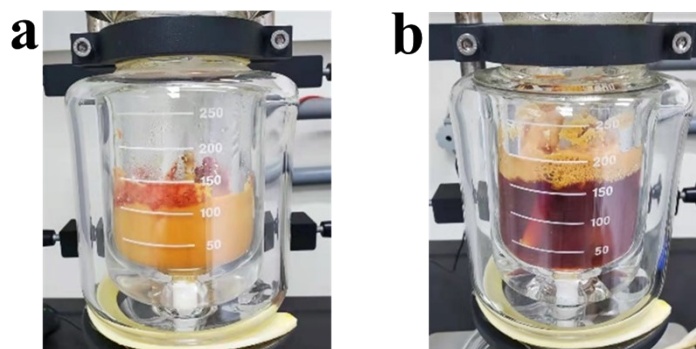

**Figure S3** a) Precipitation of the intermediate product within the oximation reaction; b) Precipitation of AAOF during the dehydration cyclization reaction.

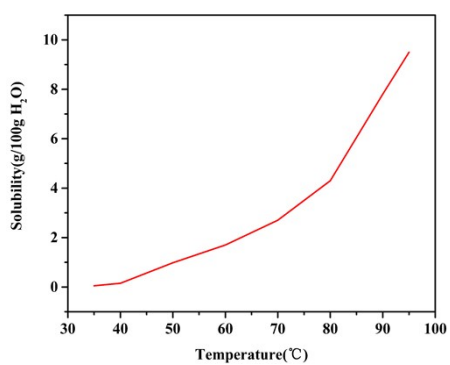

**Figure S4.** The solubility of AAOF in water at different temperature.

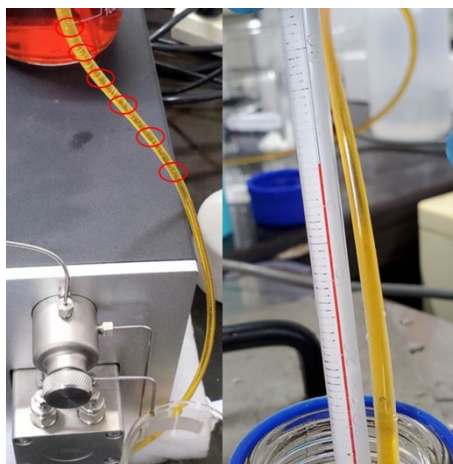

**Figure S5.** The bubble generation in the infusion tube at the room temperature (Left) and dropping the solution temperature (Right).

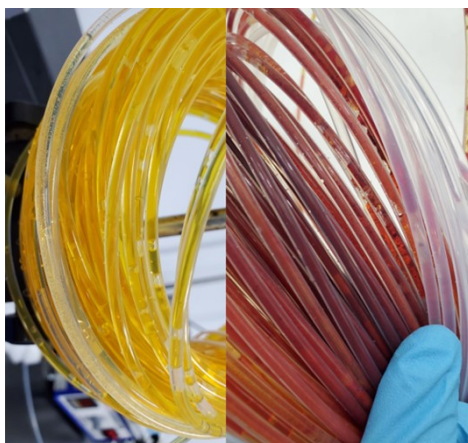

**Figure S6.** The normal operation after 1,3-Amino-Trioxime propane dissolved in water (Left) and blocked tubular reactor after solid precipitation (Right) during the oximation reaction.

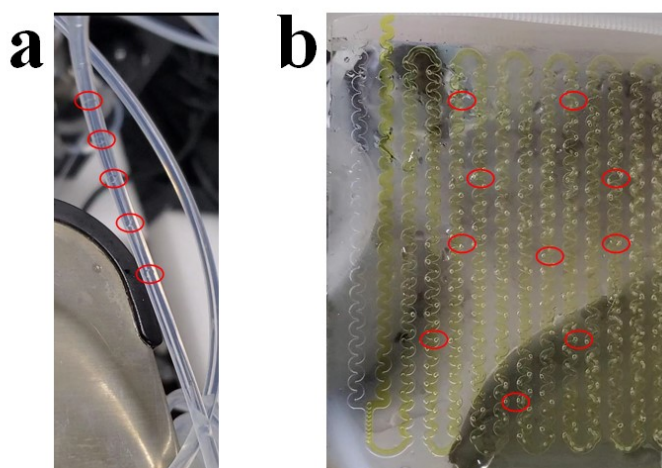

**Figures S7.** The bubble generation in the neutralization and oximation stage. a) The gas generation in the tubular reactor for the neutralization reaction. b) The gas generation in the micro-reactor for oximation the reaction.

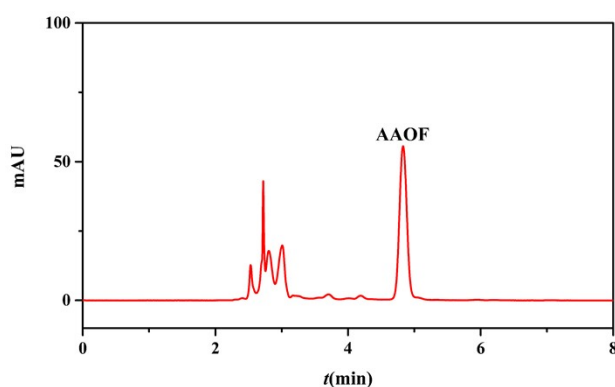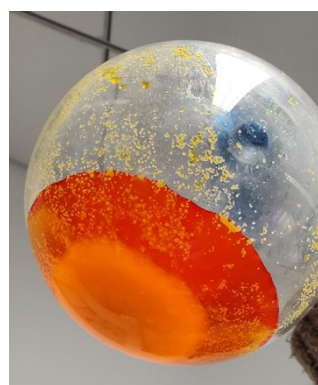

**Figures S8.** The HPLC results of the waste water after filtering AAOF (Left). The precipitation of AAOF after evaporating a part of water out of the final solution (Right).

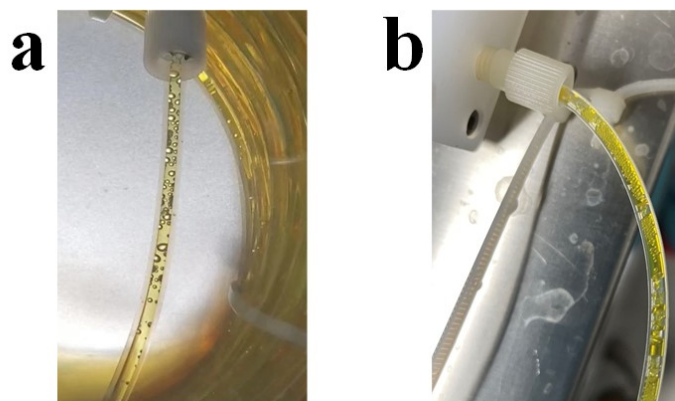

**Figures S9.** The comparison of gas generation in the extension tube at different temperature for the nitrosation-rearrangement coupling reaction. a) the reaction temperature of 15°C. b) the reaction temperature of 55°C.

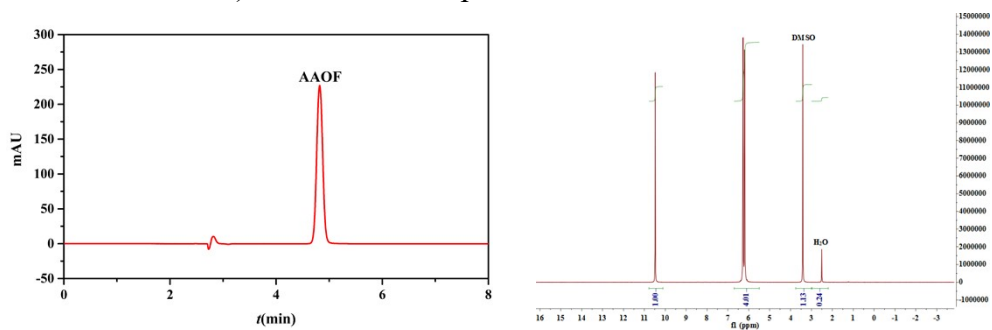

**Figures S10.** The HPLC results (Left) and  $^1\text{H}$  NMR results (Right) of AAOF.
